# Supplementary material for: Viral proteins as a potential driver of histone depletion in dinoflagellates
Source: PubMed Central journal article supplement (PMC5906630; doi:10.1038/s41467-018-03993-4), 2018-04-18
Supplement: 41467_2018_3993_MOESM3_ESM.pdf [file 41467_2018_3993_MOESM3_ESM.pdf]

## **Description of Additional Supplementary Files**

**File Name:** Supplementary Data 1

**Description:** DVNP synthetic genetic array data
